# Supplementary material for: TWEAKing the Hippocampus: The Effects of TWEAK on the Genomic Fabric of the Hippocampus in a Neuropsychiatric Lupus Mouse Model
Source: MDPI journal article supplement (doi:10.3390/genes12081172), 2021-07-29
Supplement: s1 [file s1]

## Supplementary Materials

**Table S1.** The 20 most stably expressed genes (low relative expression variability, REV) in each of the three phenotypes. Shaded genes are the genes of interest in each phenotype.

| Gene              | Description                                                                                               | MRL/lpr | Fn14ko | MRL/+ |
|-------------------|-----------------------------------------------------------------------------------------------------------|---------|--------|-------|
| <i>Xrcc4</i>      | X-ray repair complementing defective repair in Chinese hamster cells 4                                    | 0.66    | 18.31  | 12.04 |
| <i>Tubb4</i>      | tubulin, beta 4                                                                                           | 0.73    | 15.07  | 18.02 |
| <i>Ecd</i>        | ecdysoneless homolog (Drosophila)                                                                         | 1.27    | 4.64   | 23.95 |
| <i>Arhgap23</i>   | Rho GTPase activating protein 23                                                                          | 1.28    | 7.90   | 16.16 |
| <i>Ggnbp2</i>     | gametogenetin binding protein 2                                                                           | 1.36    | 10.69  | 10.32 |
| <i>Tusc2</i>      | tumor suppressor candidate 2                                                                              | 1.40    | 17.41  | 15.19 |
| <i>Med22</i>      | mediator complex subunit 22                                                                               | 1.42    | 8.15   | 20.64 |
| <i>Mfsd5</i>      | major facilitator superfamily domain containing 5                                                         | 1.42    | 9.11   | 8.62  |
| <i>Acbd3</i>      | acyl-Coenzyme A binding domain containing 3                                                               | 1.49    | 14.69  | 13.51 |
| <i>Nacad</i>      | NAC alpha domain containing                                                                               | 1.51    | 15.95  | 9.89  |
| <i>Pdia3</i>      | protein disulfide isomerase associated 3                                                                  | 1.52    | 15.96  | 22.67 |
| <i>Serf2</i>      | small EDRK-rich factor 2                                                                                  | 1.53    | 10.49  | 21.71 |
| <i>Hax1</i>       | HCLS1 associated X-1                                                                                      | 1.55    | 16.20  | 16.17 |
| <i>Pnlc1</i>      | poly(A)-specific ribonuclease (PARN)-like domain containing 1                                             | 1.56    | 11.55  | 44.31 |
| <i>Cacfd1</i>     | calcium channel flower domain containing 1                                                                | 1.77    | 16.68  | 25.14 |
| <i>Mad2l2</i>     | MAD2 mitotic arrest deficient-like 2                                                                      | 1.78    | 2.31   | 11.33 |
| <i>Ppp1r12c</i>   | protein phosphatase 1, regulatory (inhibitor) subunit 12C                                                 | 1.82    | 11.85  | 16.76 |
| <i>Rpa2</i>       | replication protein A2                                                                                    | 1.88    | 8.77   | 11.51 |
| <i>Unc79</i>      | unc-79 homolog (C. elegans)                                                                               | 1.89    | 4.81   | 32.56 |
| <i>Nfasc</i>      | neurofascin                                                                                               | 1.90    | 17.03  | 24.38 |
| <i>Ddx59</i>      | DEAD (Asp-Glu-Ala-Asp) box polypeptide 59                                                                 | 58.12   | 0.97   | 21.59 |
| <i>Rg9mtd3</i>    | RNA (guanine-9-) methyltransferase domain containing 3                                                    | 6.77    | 0.98   | 47.38 |
| <i>Ppfia1</i>     | protein tyrosine phosphatase, receptor type, f polypeptide (PTPRF), interacting protein (liprin), alpha 1 | 9.43    | 1.09   | 6.35  |
| <i>Cenpv</i>      | centromere protein V                                                                                      | 8.75    | 1.14   | 33.88 |
| <i>Polr1e</i>     | polymerase (RNA) I polypeptide E                                                                          | 7.16    | 1.17   | 20.01 |
| <i>Pclo</i>       | piccolo (presynaptic cytomatrix protein)                                                                  | 31.49   | 1.17   | 19.95 |
| <i>Map4k5</i>     | mitogen-activated protein kinase kinase kinase 5                                                          | 15.50   | 1.18   | 19.31 |
| <i>Mrpl45</i>     | mitochondrial ribosomal protein L45                                                                       | 9.22    | 1.24   | 22.10 |
| <i>Iscu</i>       | IscU iron-sulfur cluster scaffold homolog (E. coli) (Iscu), nuclear gene encoding mitochondrial protein   | 8.15    | 1.31   | 8.60  |
| <i>Riok2</i>      | RIO kinase 2 (yeast)                                                                                      | 5.43    | 1.37   | 22.03 |
| <i>Nup88</i>      | nucleoporin 88                                                                                            | 13.52   | 1.39   | 26.28 |
| <i>Fbxo25</i>     | F-box protein 25                                                                                          | 40.03   | 1.44   | 79.33 |
| <i>Plcb1</i>      | phospholipase C, beta 1                                                                                   | 13.38   | 1.44   | 61.35 |
| <i>Slc6a17</i>    | solute carrier family 6 (neurotransmitter transporter), member 17                                         | 10.46   | 1.53   | 10.30 |
| <i>Pomc</i>       | pro-opiomelanocortin-alpha                                                                                | 4.61    | 1.53   | 35.08 |
| <i>Tor2a</i>      | torsin family 2, member A                                                                                 | 45.22   | 1.55   | 13.89 |
| <i>Ccdc134</i>    | coiled-coil domain containing 134                                                                         | 7.10    | 1.60   | 16.73 |
| <i>Gpr137b-ps</i> | G protein-coupled receptor 137B, pseudogene                                                               | 9.18    | 1.61   | 14.52 |
| <i>Pdcd2</i>      | programmed cell death 2                                                                                   | 10.57   | 1.62   | 24.11 |
| <i>Gm14407</i>    | predicted gene 14407                                                                                      | 18.82   | 1.71   | 41.59 |
| <i>Tfb2m</i>      | transcription factor B2, mitochondrial                                                                    | 15.69   | 2.65   | 0.28  |
| <i>Homez</i>      | homeodomain leucine zipper-encoding gene                                                                  | 23.29   | 15.77  | 0.94  |
| <i>Ttc26</i>      | tetratricopeptide repeat domain 26                                                                        | 19.30   | 15.56  | 0.98  |

|                 |                                                                                    |       |       |      |
|-----------------|------------------------------------------------------------------------------------|-------|-------|------|
| <i>Hiatl1</i>   | hippocampus abundant transcript-like 1                                             | 13.97 | 9.72  | 1.36 |
| <i>Galns</i>    | galactosamine (N-acetyl)-6-sulfate sulfatase                                       | 25.09 | 21.35 | 1.38 |
| <i>Dfna5</i>    | deafness, autosomal dominant 5 (human)                                             | 20.16 | 10.87 | 1.45 |
| <i>Avl9</i>     | AVL9 homolog (S. cerevisiae)                                                       | 14.70 | 5.70  | 1.48 |
| <i>Dele1</i>    | DAP3 binding cell death enhancer 1                                                 | 18.28 | 11.55 | 1.55 |
| <i>Foxq1</i>    | forkhead box Q1                                                                    | 19.66 | 26.03 | 1.58 |
| <i>Gipc1</i>    | GIPC PDZ domain containing family, member 1                                        | 20.12 | 24.64 | 1.68 |
| <i>Nfkbib</i>   | nuclear factor of kappa light polypeptide gene enhancer in B-cells inhibitor, beta | 12.98 | 9.89  | 1.70 |
| <i>Tor1aip2</i> | torsin A interacting protein 2                                                     | 39.31 | 12.54 | 1.72 |
| <i>Abhd8</i>    | abhydrolase domain containing 8                                                    | 28.32 | 20.92 | 1.74 |
| <i>Ndst2</i>    | N-deacetylase/N-sulfotransferase (heparan glucosaminyl) 2                          | 8.64  | 9.60  | 1.79 |
| <i>Trim37</i>   | tripartite motif-containing 37                                                     | 41.95 | 12.85 | 1.86 |
| <i>Cnnm4</i>    | cyclin M4                                                                          | 16.35 | 4.75  | 1.90 |
| <i>Lmna</i>     | lamin A                                                                            | 15.22 | 16.69 | 1.92 |
| <i>Gga2</i>     | golgi associated, gamma adaptin ear containing, ARF binding protein 2              | 19.14 | 17.78 | 1.97 |
| <i>Mettl11a</i> | methyltransferase like 11A                                                         | 39.50 | 6.43  | 1.99 |
| <i>Syt11</i>    | synaptotagmin XI                                                                   | 13.12 | 9.44  | 2.07 |

**Table S2. The 20 most unstably expressed genes (high REV) in each of the three phenotypes.** Shaded genes are the genes of interest in each phenotype.

| Gene            | Description                                                       | MRL/lpr | Fn14ko | MRL/+ |
|-----------------|-------------------------------------------------------------------|---------|--------|-------|
| <i>Kctd10</i>   | potassium channel tetramerisation domain containing 10            | 200.0   | 43.4   | 97.5  |
| <i>Syne2</i>    | synaptic nuclear envelope 2                                       | 200.0   | 25.3   | 73.7  |
| <i>Vprbp</i>    | Vpr (HIV-1) binding protein                                       | 199.9   | 29.0   | 75.6  |
| <i>Dnajc28</i>  | DnaJ (Hsp40) homolog, subfamily C, member 28                      | 199.9   | 10.8   | 49.4  |
| <i>Gpr183</i>   | G protein-coupled receptor 183                                    | 199.9   | 18.9   | 70.8  |
| <i>Zfp455</i>   | zinc finger protein 455                                           | 199.9   | 11.0   | 37.4  |
| <i>Clec14a</i>  | C-type lectin domain family 14, member a                          | 199.9   | 21.7   | 39.5  |
| <i>Lrrc2</i>    | leucine rich repeat containing 2                                  | 199.9   | 5.5    | 55.8  |
| <i>Abcc3</i>    | ATP-binding cassette, sub-family C (CFTR/MRP), member 3           | 199.9   | 36.0   | 41.2  |
| <i>Mki67</i>    | antigen identified by monoclonal antibody Ki 67                   | 199.9   | 29.9   | 55.1  |
| <i>Dlx5</i>     | distal-less homeobox 5                                            | 199.8   | 21.5   | 48.8  |
| <i>Tmie</i>     | transmembrane inner ear                                           | 199.7   | 15.7   | 53.2  |
| <i>Sall1</i>    | sal-like 1 (Drosophila)                                           | 199.7   | 5.5    | 37.7  |
| <i>Ybx2</i>     | Y box protein 2                                                   | 199.7   | 25.9   | 27.0  |
| <i>Dnajc14</i>  | DnaJ (Hsp40) homolog, subfamily C, member 14                      | 199.7   | 24.3   | 24.0  |
| <i>Cradd</i>    | CASP2 and RIPK1 domain containing adaptor with death domain       | 199.7   | 16.1   | 27.0  |
| <i>Tank</i>     | TRAF family member-associated Nf-kappa B activator                | 199.5   | 16.8   | 6.5   |
| <i>Marf1</i>    | meiosis regulator and mRNA stability 1                            | 199.4   | 24.1   | 26.1  |
| <i>Eif2s1</i>   | eukaryotic translation initiation factor 2, subunit 1 alpha       | 199.4   | 15.3   | 29.1  |
| <i>Tle6</i>     | transducin-like enhancer of split 6, homolog of Drosophila E(spl) | 199.4   | 31.7   | 21.0  |
| <i>Serpina9</i> | serine (or cysteine) peptidase inhibitor, clade A                 | 21.7    | 159.0  | 84.8  |
| <i>Gpr88</i>    | G-protein coupled receptor 88                                     | 85.3    | 154.6  | 55.3  |
| <i>Scn4b</i>    | sodium channel, type IV, beta                                     | 58.2    | 151.4  | 12.5  |
| <i>Drd1</i>     | dopamine receptor D1                                              | 61.8    | 149.4  | 58.8  |
| <i>Penk</i>     | preproenkephalin                                                  | 66.9    | 145.4  | 66.3  |
| <i>Ppp1r1b</i>  | protein phosphatase 1, regulatory (inhibitor) subunit 1B          | 53.3    | 134.2  | 26.5  |
| <i>Adora2a</i>  | adenosine A2a receptor                                            | 57.3    | 132.1  | 87.2  |
| <i>Rgs9</i>     | regulator of G-protein signaling 9                                | 21.6    | 127.2  | 34.1  |

|                |                                                              |       |       |       |
|----------------|--------------------------------------------------------------|-------|-------|-------|
| <i>Tac1</i>    | tachykinin 1                                                 | 20.5  | 127.1 | 38.3  |
| <i>Gpr6</i>    | G protein-coupled receptor 6                                 | 32.2  | 116.2 | 57.4  |
| <i>H2-Ab1</i>  | histocompatibility 2, class II antigen A, beta 1             | 51.2  | 115.8 | 62.8  |
| <i>Ccl2</i>    | chemokine (C-C motif) ligand 2                               | 52.9  | 114.5 | 91.2  |
| <i>Tmem90a</i> | transmembrane protein 90a                                    | 21.5  | 111.9 | 45.7  |
| <i>Pde10a</i>  | phosphodiesterase 10A                                        | 39.6  | 105.1 | 46.8  |
| <i>Rasd2</i>   | RASD family, member 2                                        | 47.2  | 104.2 | 12.1  |
| <i>Lyz1</i>    | lysozyme 1                                                   | 64.0  | 103.7 | 64.0  |
| <i>Rarb</i>    | retinoic acid receptor, beta                                 | 26.5  | 102.9 | 58.7  |
| <i>Pde7b</i>   | phosphodiesterase 7B                                         | 55.1  | 101.4 | 76.0  |
| <i>Lrrc10b</i> | leucine rich repeat containing 10B                           | 93.3  | 99.5  | 10.8  |
| <i>Igj</i>     | immunoglobulin joining chain                                 | 130.0 | 99.3  | 106.9 |
| <i>Nkap</i>    | NFKB activating protein                                      | 3.5   | 11.6  | 192.0 |
| <i>Mettl24</i> | methyltransferase like 24                                    | 9.9   | 20.7  | 164.7 |
| <i>Oxt</i>     | oxytocin                                                     | 31.9  | 41.0  | 161.8 |
| <i>Mybpc3</i>  | myosin binding protein C, cardiac                            | 56.4  | 65.0  | 118.4 |
| <i>Aqp5</i>    | aquaporin 5                                                  | 75.2  | 73.7  | 118.1 |
| <i>C7</i>      | complement component 7                                       | 66.6  | 68.1  | 117.9 |
| <i>Olfr681</i> | olfactory receptor 681                                       | 62.5  | 50.2  | 117.3 |
| <i>Gcnt1</i>   | glucosaminyl (N-acetyl) transferase 1, core 2                | 69.7  | 65.8  | 116.6 |
| <i>Ttr</i>     | transthyretin                                                | 87.8  | 75.1  | 116.3 |
| <i>Ifi202b</i> | interferon activated gene 202B                               | 58.4  | 83.5  | 115.3 |
| <i>Barx2</i>   | BarH-like homeobox 2                                         | 84.2  | 79.9  | 114.8 |
| <i>Nrtn</i>    | neurturin                                                    | 11.2  | 29.3  | 114.5 |
| <i>Zbtb44</i>  | zinc finger and BTB domain containing 44                     | 73.2  | 64.1  | 114.4 |
| <i>Chrn1b</i>  | cholinergic receptor, nicotinic, beta polypeptide 1 (muscle) | 51.5  | 54.5  | 114.4 |
| <i>Avp</i>     | arginine vasopressin                                         | 38.7  | 27.0  | 114.1 |
| <i>Gm6762</i>  | predicted pseudogene 6762                                    | 75.8  | 73.1  | 113.1 |
| <i>Rab33b</i>  | RAB33B, member of RAS oncogene family                        | 52.4  | 43.6  | 113.1 |
| <i>Gphb5</i>   | glycoprotein hormone beta 5                                  | 89.8  | 75.6  | 112.4 |
| <i>Tekt2</i>   | tektin 2                                                     | 135.6 | 52.8  | 111.6 |
| <i>Ltbp2</i>   | latent transforming growth factor beta binding protein 2     | 52.4  | 60.9  | 111.5 |
